# Supplementary material
Source: Frontiers journal article supplement (https://www.frontiersin.org/articles/133781)
Supplement: Data_Sheet_1.DOCX [file Data_Sheet_1.DOCX]

**Supplementary Information References**

Christie, M., Fazey, I., Cooper, R., Hyde, T., Kenter, J.O. (2012). An evaluation of monetary and non-monetary techniques for assessing the importance of biodiversity and ecosystem services to people in countries with developing economies. Ecological Economics 83, 67–78. doi:10.1016/j.ecolecon.2012.08.012

De Koning, F.; Aguiňaga, M.; Bravo, M.; Chiv, M.; Lascano, M.; Lozada, T. et al., (2011). Bridging the gap between forest conservation and poverty alleviation: the Ecuadorian Socio Bosque program. Environmental Science & Policy 14, 531-542. doi:10.1016/j.envsci.2011.04.007

Groom, B., Palmer, C. (2012). REDD+ and rural livelihoods. Biological Conservation 154, 42–52. doi:10.1016/j.biocon.2012.03.002

Hedge, R. & Bull, G.Q. (2011). Performance of an agro-forestry based payments for environmental services project in Mozambique: a household level survey. Ecological Economics 71, 122-130. doi:10.1016/j.ecolecon.2011.08.014

Krause, T., Loft, L. (2013). Benefit distribution and equity in Ecuador’s Socio Bosque program. Society & Natural Resources 26, 1170-1184. doi:10.1080/08941920.2013.797529

Liu, S., Costanza, R., Farber, S., Troy, A. (2010). Valuing ecosystem services: theory, practice, and the need for a transdisciplinary synthesis. Annals of the New York Academy of Sciences 1185, 54–78. doi:10.1111/j.1749-6632.2009.05167.x

Mendelsohn, R., Olmstead, S. (2009). The economic valuation of environmental amenities and disamenities: methods and applications. Annual Review of Environment & Resources 34, 325–347. doi:10.1146/annurev-environ-011509-135201

Turner, R.K., Morse-Jones, S., Fisher, B. (2010). Ecosystem valuation: a sequential decision support system and quality assessment issues. Annals of the New York Academy of Sciences 1185, 79–101. doi:10.1111/j.1749-6632.2009.05280.x

Vo, Q.T., Kuenzer, C., Vo, Q.M., Moder, F., Oppelt, N. (2012). Review of valuation methods for mangrove ecosystem services. Ecological Indicators 23, 431–446. doi:10.1016/j.ecolind.2012.04.022
